# Supplementary material for: Curved adhesions mediate cell attachment to soft matrix fibres in 3D
Source: bioRxiv preprint, doi:10.1101/2023.03.16.532975, version 1 (2023-03-19)
Supplement: Supplementary Information [file 532975_file03.pdf]

## Supplementary Information

**Supplementary Table 1: Information on shRNAs.**

| Target protein                 | Source        | Identifier     | Target sequence       | KD efficiency |
|--------------------------------|---------------|----------------|-----------------------|---------------|
| Integrin $\beta$ 5             | Sigma-Aldrich | TRCN0000296117 | AGCTTGTTGTCCCAATGAAAT | 85%           |
|                                |               | TRCN0000289121 | CTGAGGGCAAACCTTGTCAAA | 84%           |
|                                |               | TRCN0000296116 | GGATCAGCCTGAGGATCTTAA | 82%           |
| AP2- $\mu$                     | Sigma-Aldrich | TRCN0000060239 | CACCAGCTTCTTCCACGTAA  | 94%           |
|                                |               | TRCN0000060241 | GCTGGATGAGATTCTAGACTT | 95%           |
| Clathrin heavy chain           | Sigma-Aldrich | TRCN0000011216 | CGGTTGCTCTTGTTACGGATA | 88%           |
|                                |               | TRCN0000007981 | CGTGTCTTGTAACCTTTATT  | 97%           |
| FCHo1                          | Sigma-Aldrich | TRCN0000162794 | CACAACCGCTATTGAGCACTT | NA            |
|                                |               | TRCN0000164648 | GCAGGAAGCGATGAAACGTTT | NA            |
| FCHo2                          | Sigma-Aldrich | TRCN0000167218 | GCTACAGTATTAAACCAGAAA | 88%           |
|                                |               | TRCN0000167925 | CCAAAGCTTACTTCAGGCAAA | 75%           |
| EPS15                          | Sigma-Aldrich | TRCN0000007980 | CCCAGAATGGATTGGAAGTTT | 86%           |
|                                |               | TRCN0000007978 | GCAGTGAAACAGCCAACCTTA | 79%           |
| EPS15R                         | Sigma-Aldrich | TRCN0000233084 | GAGCATGCCACCGCCTAAATT | 77%           |
|                                |               | TRCN0000233083 | AGTCTGGCCTCTCGGACATTA | 72%           |
| Intersectin 1                  | Sigma-Aldrich | TRCN0000002009 | GCACTAGCTGACATGAATAAT | 64%           |
|                                |               | TRCN0000002010 | GCAGTTGTTTGATGAGCCGTA | 56%           |
| Intersectin 2                  | Sigma-Aldrich | TRCN0000002385 | CCTGGACTGCAAAGAAAGATA | 75%           |
|                                |               | TRCN0000318540 | GCAGAACGTAAAGCCCAGAAA | 84%           |
| Scramble<br>(Negative control) | Addgene       | Cat#1864       | CCTAAGGTAAAGTCGCCCTCG | NA            |

4 **Supplementary Table 2. Information on antibodies.**

| Name                                                            | Source                    | Identifier     |
|-----------------------------------------------------------------|---------------------------|----------------|
| <b>Primary antibodies</b>                                       |                           |                |
| Rat anti-integrin $\beta$ 1 antibody (clone 9EG7)               | BD Biosciences            | Cat#550531     |
| Mouse anti-activated integrin $\beta$ 1 antibody (clone HUTS-4) | Sigma-Aldrich             | Cat#MAB2079Z   |
| Mouse anti-integrin $\alpha$ v $\beta$ 5 antibody (clone P5H9)  | R&D Systems               | Cat#MAB2528    |
| Mouse anti-alpha adaptin antibody [AP6]                         | Abcam                     | Cat#ab2730     |
| Mouse anti-vinculin antibody (clone hVIN-1)                     | Sigma-Aldrich             | Cat#V9131      |
| Mouse anti-paxillin antibody (clone 349/Paxillin)               | BD Biosciences            | Cat#610051     |
| Mouse anti-talin1 antibody (clone 8D4)                          | Abcam                     | Cat#ab157808   |
| Mouse Anti-Vitronectin/S-Protein antibody (clone VN58-1)        | Abcam                     | Cat#ab13413    |
| Rabbit anti-FAK (phospho Y397) antibody (clone EP2160Y)         | Abcam                     | Cat#ab81298    |
| Rabbit anti-Clathrin heavy chain antibody (Polyclonal)          | Abcam                     | Cat#ab21679    |
| Rabbit anti-integrin $\beta$ 5 antibody (clone D24A5)           | Cell signaling technology | Cat#3629S      |
| Rabbit anti-FCHo2 antibody (Polyclonal)                         | Novus Biologicals         | Cat#NBP2-32694 |
| Rabbit anti-GAPDH (clone 14C10)                                 | Cell signaling technology | Cat#2118       |
| Rabbit anti-GFP antibody (Polyclonal)                           | Invitrogen                | Cat#A-11122    |
| Mouse anti-mCherry antibody (clone GT857)                       | Sigma-Aldrich             | Cat#SAB2702291 |
| <b>Secondary antibodies</b>                                     |                           |                |
| Alexa Fluor 488-conjugated goat anti-Mouse IgG (H+L) antibody   | Thermo Fisher Scientific  | Cat#A-11001    |
| Alexa Fluor 568-conjugated goat anti-Mouse IgG (H+L) antibody   | Thermo Fisher Scientific  | Cat#A-11004    |
| Alexa Fluor 488-conjugated goat anti-Rabbit IgG (H+L) antibody  | Thermo Fisher Scientific  | Cat#A-11034    |
| Texas Red-conjugated goat anti-Rabbit IgG (H+L) antibody        | Thermo Fisher Scientific  | Cat#T2767      |
| Alexa Fluor 647-conjugated goat anti-Rat IgG (H+L) antibody     | Thermo Fisher Scientific  | Cat#A-21247    |
| HRP-linked goat anti-Rabbit IgG (H+L) antibody                  | Cell signaling technology | Cat#7074       |
| HRP-linked goat anti-Mouse IgG (H+L) antibody                   | Cell signaling technology | Cat#7076       |

5

6 **Supplementary Table S3: The statistics for null hypothesis testing**

| Figure                                   | Test                |             | Degrees of freedom    | Specifics                  |
|------------------------------------------|---------------------|-------------|-----------------------|----------------------------|
| Fig. 1k                                  | One-way ANOVA       |             | F (10,77) = 140.8     | R <sup>2</sup> = 0.9481    |
| Fig. 2d                                  | Kruskal-Wallis test |             | 3                     | H = 1222                   |
| Fig. 2i                                  | One-way ANOVA       |             | F (7,72) = 97.35      | R <sup>2</sup> = 0.9044    |
| Fig. 2m                                  | Kruskal-Wallis test | Vitronectin | 5                     | H = 91.28                  |
|                                          |                     | Fibronectin | 5                     | H = 67.26                  |
|                                          | Mann Whitney test   | Gelatin     | n/a                   | U = 720.5                  |
|                                          | t-test              | PLL         | t = 0.1411, df = 70   | R <sup>2</sup> = 0.0002843 |
|                                          | t-test              | BSA         | t = 1.246, df = 73    | R <sup>2</sup> = 0.02083   |
| Fig. 3d                                  | One-way ANOVA       |             | F (4, 55) = 0.4478    | R <sup>2</sup> = 0.03154   |
| Fig. 3i                                  | t-test              |             | t = 7.761, df = 17.07 | R <sup>2</sup> = 0.7792    |
|                                          | One-way ANOVA       |             | F (4, 55) = 120.3     | R <sup>2</sup> = 0.8974    |
| Fig. 4d                                  | Mann Whitney test   |             | n/a                   | U = 2998                   |
| Fig. 4g                                  | One-way ANOVA       |             | F (3, 181) = 39.93    | R <sup>2</sup> = 0.3983    |
| Fig. 4j                                  | One-way ANOVA       |             | F (8, 225) = 60.44    | R <sup>2</sup> = 0.6824    |
| Fig. 5h                                  | Kruskal-Wallis test | Number      | 3                     | H = 45.30                  |
|                                          | t-test              | Size 2D     | t = 13.61, df = 21    | R <sup>2</sup> = 0.8982    |
|                                          |                     | Size 3D     | t = 5.423, df = 8     | R <sup>2</sup> = 0.7861    |
| Fig. 6c                                  | Kruskal-Wallis test | U2OS        | 5                     | H = 294.2                  |
|                                          |                     | A549        | 5                     | H = 203.6                  |
|                                          |                     | Hela        | 5                     | H = 113.3                  |
| Extended Data Fig. 3c                    | Kruskal-Wallis test |             | 3                     | H = 969.4                  |
| Extended Data Fig. 7e                    | Kruskal-Wallis test |             | 2                     | H = 58.3                   |
| Extended Data Fig. 9c                    | t-test              |             | t = 11.76, df = 16    | R <sup>2</sup> = 0.8963    |
| Extended Data Fig. 10b                   | One-way ANOVA       |             | F (2, 96) = 25.46     | R <sup>2</sup> = 0.3466    |
| *Confidence level is 0.05 for all tests. |                     |             |                       |                            |

7

**Supplementary Video 1. Dynamics of curved adhesions at nanopillars.**

Live-cell fluorescence imaging of U2OS cell expressing ITG $\beta$ 5-GFP stained with a plasma membrane marker CellMask Red on vitronectin-coated nanopillars at 15 s/frame for ~80 min. The ratiometric images of ITG $\beta$ 5/membrane (normalized by its mean per cell) are shown in the Parula color scale. Time (in seconds) is indicated. Most curved adhesions at nanopillars are stable for the ~80-min time duration. Meanwhile, few curved adhesions slowly assemble and disassemble at nanopillars. Scale bar, 5  $\mu$ m.

**Supplementary Video 2. Dynamics of FCHo2 accumulations in curved adhesions at nanopillars.**

Live-cell fluorescence imaging of U2OS cell co-expressing ITG $\beta$ 5-GFP and RFP-FCHo2 on vitronectin-coated nanopillars at 15 s/frame for ~20 min. Time (in seconds) is indicated. The FCHo2 accumulations are strong and stable in curved adhesions marked by ITG $\beta$ 5 accumulations at nanopillars (representative ones are indicated by white circles), suggesting that FCHo2 is an integral component of curved adhesions. Some nanopillars without ITG $\beta$ 5 accumulation (representative ones indicated by yellow circles) also show FCHo2 accumulations, but these accumulations are usually weak and dynamic, exhibiting frequent assembly and disassembly on a time scale of minutes. Scale bar, 5  $\mu$ m.

**Supplementary Video 3. Z-stack images of cells staying on the top of a 3D matrix of pure collagen fibers.**

Confocal fluorescence images of U2OS cells expressing GFP-CaaX (green). Cells were plated on the top of a 3D matrix made of collagen fibers labeled with AF647-collagen. After 72 hours of culture, cells mostly stay on the top of the matrix (magenta). The top 100  $\mu$ m of the sample was

imaged every 0.5  $\mu\text{m}$  from the bottom to the top. The Z positions are indicated. Scale bar, 10  $\mu\text{m}$ .  
The corresponding 3D projection (side view) is shown in **Extended Data Fig. 13a** (left).

**Supplementary Video 4. Z-stack images of cells embedded in a 3D matrix of vitronectin fibers.**

Confocal fluorescence images of U2OS cells expressing GFP-CaaX (green). Cells were plated on the top of a 3D matrix made of vitronectin fibers labeled with AF647-collagen. After 72 hours of culture, cells have infiltrated and are fully embedded in the matrix (magenta). The top 100  $\mu\text{m}$  of the sample was imaged every 0.5  $\mu\text{m}$  from the bottom to the top. The Z positions are indicated. Scale bar, 10  $\mu\text{m}$ . The corresponding 3D projection (side view) is shown in **Extended Data Fig. 13a** (right).

**Supplementary Video 5. Z-stack images of curved adhesions in 3D.**

Confocal fluorescence images of immunolabeled ITG $\beta$ 5 (magenta) in U2OS cells expressing FCHo2-GFP (green) embedded in a 3D matrix made of vitronectin fibers labeled with AF647-collagen (grayscale). Curved adhesions, the colocalizations of ITG $\beta$ 5 and FCHo2 along vitronectin fibers, form extensively. The images were acquired every 0.5  $\mu\text{m}$  from the bottom to the top and the Z positions are indicated. Scale bar, 25  $\mu\text{m}$ .

**Supplementary Video 6. Z-stack images of focal adhesions in 3D.**

Confocal fluorescence images of immunolabeled vinculin (green) and ITG $\beta$ 5 (magenta) in U2OS cells embedded in a 3D matrix made of vitronectin fibers labeled with AF647-collagen (grayscale). Focal adhesions, the colocalizations of ITG $\beta$ 5 and vinculin, are barely observed throughout the cells. Meanwhile, ITG $\beta$ 5 still extensively accumulates along the ECM fibers. The images were acquired every 0.5  $\mu\text{m}$  from the bottom to the top and the Z positions are indicated. Scale bar, 25  $\mu\text{m}$ .
